# Supplementary material for: Dorsal‐to‐ventral imbalance in the superior longitudinal fasciculus mediates methylphenidate’s effect on beta oscillations in ADHD
Source: PubMed Central journal article supplement — Psychophysiology. 2022 Feb 14;59(5):e14008. doi: 10.1111/psyp.14008 (PMC9287074; doi:10.1111/psyp.14008), 2022-02-14
Supplement: PSYP-59-0-s001.pdf [file PSYP-59-0-s001.pdf]

1 Dorsal-to-ventral imbalance in the superior longitudinal  
2 fasciculus mediates methylphenidate's effect on beta  
3 oscillations in ADHD

4  
5 C. Mazzetti, C. G. Damatac, E. Sprooten N. ter Huurne, J.K. Buitelaar, O. Jensen

6 **Supplementary material**

7 **Supplementary Materials and Methods**

8 *Participants*

9 ADHD children were recruited from different local establishments and general practitioners' offices.  
10 Children from both groups were recruited via advertisements in local schools and public places, and  
11 through the study website. The experiment was conducted in compliance with the declaration of  
12 Helsinki and was approved by the local ethics board (CMO region Arnhem-Nijmegen, 2016-2268) and  
13 study was preregistered on the Netherlands Trial Register (<https://www.trialregister.nl>) under the  
14 identification NL56007.091.15. All parents gave written informed consent, while children gave oral  
15 consent.

16 For both groups, inclusion criteria were: 1) age between 8 and 12 years at the time of the experiment;  
17 2) male; 3) enrolled in primary, not secondary, school; and 4) derived FSIQ measure > 70. For the  
18 ADHD diagnosed group, additional inclusion criteria were: 1) a clinical diagnosis of ADHD according  
19 to DSM-5 criteria (American Psychiatric Association, 2013); 2) scoring in the clinical range on the  
20 ADHD DSM-5 rating scale; 3) being treated with stimulant medication for ADHD (either long or short  
21 active formulations), which started at least three months before the inclusion in the study. For both  
22 groups, exclusion criteria were: 1) neurological disorders (e.g., epilepsy), currently or in the past; 2)  
23 cardiovascular disease, currently or in the past; 3) serious motor or perceptual handicap; 4) standard

24 MRI exclusion criteria (e.g., metal objects/fragments in the body, active implants, brain surgery,  
25 claustrophobia). Comorbidities were documented, where present, as assessed by the Childhood  
26 Behaviour Checklist (CBCL) (Achenbach, 1999), completed by the parents. For the ADHD group,  
27 additional comorbidities screening was performed during the psychiatric intake. For the TD group, the  
28 absence of psychiatric disorders was assessed via a screening form completed and signed by parents.  
29 27 children with a diagnosis of ADHD and 27 typically developing (TD) male children were included  
30 in the current study. 9 children in the ADHD group withdrew from the experiment after at least one  
31 session, because of the parents' decision (N=5), claustrophobic reaction to the MRI scan (N=1),  
32 claustrophobic reaction in the MEG room (N=1) and excessive moments during MEG measurements  
33 (N=2). One participant in the TD group was excluded from the analysis, given he was diagnosed with  
34 ADHD following the end of the data collection.

35 Continuous MEG data were acquired and analyzed for the remaining 44 participants, leaving a total of  
36 18 children in the ADHD group (age:  $10.8 \pm 1.0$  years) and 26 children in the TD group (age:  $10.7 \pm 1.2$ ).  
37 Although structural MRI data were collected for 50 children (27 TD), we here focus only on  
38 electromagnetic results. The MRI protocol and data analysis are thus not further described.

39 While only the completed datasets (MEG and MRI/DWI) were considered for the analyses related to  
40 behavioral task performance and MEG-recorded beta modulation (leaving a total of 18 children  
41 diagnosed with ADHD (mean age  $10.8 \pm 1.0$  years) and 26 TD children ( $10.7 \pm 1.2$ )), all MR data (49, of  
42 which 27 TD: mean age  $10.7 \pm 1.3$ , and 22 ADHD mean age  $10.7 \pm 1.0$ ) available were instead used for  
43 analysis of correlation with ADHD symptom scores.

44

#### 45 *Experimental Design*

46 The study consisted of two experimental sessions for the TD group, and three sessions for the ADHD  
47 group, within a randomized placebo-controlled double-blind crossover design. Before visiting the  
48 institute, parents were asked to fill the Child Behavioral Checklist (CBCL) and ADHD rating scale  
49 questionnaires (ADHD-RS). Parents of the participants in the ADHD group, were asked to fill the latter

50 one twice: once referring to the child's symptomatology pattern while observing him on medication,  
51 and once referring to behavior without medication (in this case, the parents were asked to observe their  
52 child during the withdrawal period before the experiment). During the first intake-session, children of  
53 both groups underwent behavioral testing. This involved a *Line Bisection Test* (LBT), to assess  
54 individuals' spatial biases by asking participants to mark with a pencil the center of a series of horizontal  
55 lines (performed both with the left and the right hand) and, if intelligence had not been assessed over  
56 the past two years, the *Vocabulary* and *Block Design* subtests of the Wechsler Intelligence Scale (WISC-  
57 III), designed for children (Kaufman, 1994; Woolger, 2001); Dutch version in (Kort et al., 2002)), in  
58 order to estimate the FSIQ. These subscales have been shown to hold high correlation with the full-  
59 scale IQ testing (Herrera-Graf et al., 1996). For the ADHD group, an in-depth intake was conducted by  
60 a psychiatrist, where a 30 min interview with parents and son, together with physical examination, were  
61 employed to determine the medication dosage to be used during the task, based on operating procedures  
62 followed in prior studies, describing a medium dosage of 0.3 mg/kg (Linssen et al., 2014). Based on the  
63 screening, one of the two standardized dosages was chosen (either 10 or 15mg Methylphenidate  
64 immediate release; IR-MPH). Following the behavioral screenings, children of both groups were  
65 introduced to the MRI procedure, and were given the opportunity of getting acquainted with the scanner  
66 environment by practicing in a so-called '*dummy scanner*', which simulates the environment of a real  
67 MRI scanner. If the child was unable to stay still or felt uncomfortable during the dummy scan, the  
68 session was cancelled and he was excluded from further participation. Otherwise, the MRI session took  
69 place for a duration of ~30mins.

70 During the second visit, both groups undertook the MEG testing, followed by 3-D head digitization  
71 using an electromagnetic digitizer (*Polhemus*, Colchester, VT). For the TD group, this constituted the  
72 last day of testing, while for the ADHD group, two MEG sessions were planned at two different visits,  
73 separated by at least one-week interval. Children diagnosed with ADHD performed the MEG task twice  
74 under two conditions (MPH and placebo), according to a randomized order and double-blind procedure.  
75 Prior to each MEG session, participants were asked to withdraw from their clinically prescribed  
76 medication intake for 24 hours, depending on the planned time of the recording session (e.g. if the  
77 session was planned in the morning of Monday, the child took his last medication on Sunday morning,

78 abstaining until the experiment). To ensure this, parents agreed on being contacted prior to the  
79 experiment to be reminded about the medication withdrawal procedure, to be followed in preparation  
80 to the testing day (e.g., in the example above, parents were contacted on Saturday). The 24 hour  
81 treatment suspension allowed to control for withdrawal symptoms related to drug administration  
82 (rebound effect) (Carlson and Kelly, 2003). MEG testing began one hour after medication intake,  
83 allowing to reach on average moderate plasma concentration ( $C_{max}$ ) of the drug along the experiment,  
84 which progressively increases and reaches its peak around the second hour post-intake (Quinn et al.,  
85 2007). After completion of the MEG session, participants were asked to proceed with their regular  
86 treatment using their own stimulant formulation. At the beginning of the experimental session, parents  
87 and children were asked to confirm that the medication withdrawal procedure was followed  
88 appropriately.

89

#### 90 *MEG data acquisition and analysis*

91 Electromagnetic brain activity was recorded from the participants seated in a CTF 275-sensor whole-  
92 head MEG system with axial gradiometers (CTF MEG Systems, VSM MedTech Ltd.). The data were  
93 sampled at 1200Hz, following an antialiasing lowpass filter set at 300Hz. Head position was constantly  
94 monitored throughout the experiment via online head-localization software. This was done by three  
95 head localization coils placed at anatomical fiducials (nasion, left and right ear), allowing, if necessary,  
96 readjustment of the participant's position between blocks.

97 MEG data analysis was performed using the MATLAB FieldTrip Toolbox (Oostenveld et al., 2011).

98 The continuous data were segmented in epochs centered around the onset of the motor response (-2000

99 to 200 ms). A notch filter was applied at 50, 100, 150 Hz to remove line noise, after which the mean

100 was subtracted and the linear trend removed. Trials with incorrect responses according to the cued

101 hemifield were discarded. Artifacts were rejected first via a semi-automatic artifacts' rejection of trials

102 with MEG sensor jumps and muscle artifacts, then through visual inspection to further detect and

103 remove trials with eye blinks and systematic saccades which did not exceed the boundary box set by

104 the eye tracker but still produced detectable visual artifacts. ICA was then used to further remove  
105 components reflecting eye blinks and heart artifacts.

106 Prior to the time-frequency analysis of power, we generated virtual planar gradiometers from spatial  
107 derivatives of the axial magnetic components (Bastiaansen and Knösche, 2000). Time-frequency  
108 representations (TFRs) of power were then computed for each pair of orthogonal planar gradiometers,  
109 and power values were then summed for each MEG sensor. Power analysis was performed using a 600  
110 ms time-window sliding in steps of 50 ms along the full trial time window specified above (locked to  
111 the onset of the motor response). The resulting data segments were multiplied by a Hanning taper and  
112 a fast Fourier transform was applied in the 2 – 40Hz frequency range, in steps of 1.66 Hz. The steps  
113 above were followed as well for cue-locked epochs, obtained by re-defining the trials according to the  
114 onset of the cue, considering a time window for power calculation [-1000–1000]ms around cue onset.  
115 These data were then used for baseline computation, to be later subtracted from motor response locked  
116 power (relative change baseline).

117 In order to estimate patterns of beta modulation indices ( $\beta$ -MI) in preparation to the motor response,  
118 we performed a baseline correction (relative change) of response-locked data segments with respect to  
119 pre-cue activity per sensor (cue locked data segments). For each subject, we implemented a relative  
120 baseline correction using the averaged power in the time window [-300 – 0] ms *cue locked*, applied to  
121 the *motor response locked* data. The baselined TFRs for all subjects were then averaged across  
122 conditions and the three groups (TD, ADHD<sub>MPH</sub>, ADHD<sub>Placebo</sub>), in order to identify the sensors of  
123 interest to be used in further analyses. To this aim, we selected a cluster of 20 symmetrical pairs of  
124 central sensors, displaying the highest beta depression values (lowest  $\beta$ -MI) in the 1000ms time-  
125 window preceding the onset of the motor response. The same sensors were then used for the estimation  
126 of mean beta desynchronization indices (Preparation Index of beta, PI( $\beta$ )) for each subject, by averaging  
127 MI( $\beta$ )s across the time window of interest ( $f= 15 - 30\text{Hz}$ ,  $-1000 < t < 0$  ms).

128 ***MRI data acquisition parameters***

129 MRI data were acquired at the Donders Institute (DCCN) using a 3T MAGNETOM Skyra MR scanner  
130 (Siemens AG, Healthcare Sector, Erlangen, Germany) with a product 32-channel head coil. The MRI  
131 protocol included a T1-weighted MRI scan for anatomical reference and analysis and diffusion-  
132 weighted MRI scans for probing microstructural properties and for performing fiber tractography.

133 Whole brain high resolution T1-weighted anatomical data were acquired with sagittal as primary slice  
134 direction (MP-RAGE, 192 slices, acquisition matrix 256×256, voxel size 1×1×1mm, slice thickness 7.0  
135 mm, TR=2300ms, TE=3.03ms, TI=1100ms, flip angle= 8°, GRAPPA-acceleration 2). **Whole brain**  
136 **diffusion-weighted images (DWI) were collected with the following protocol: Bipolar acquisition**  
137 **scheme, reverse phase-encoding polarity (PE during scan: A>P, resulting inverted PE:P>A), acquisition**  
138 **matrix: 104x104x72, 111 diffusion-weighted directions; b-factor 1500s/mm<sup>2</sup>; 11 non-diffusion-**  
139 **weighted images; interleaved slice acquisition; TE/TR=99.8/3670ms; multi-band acceleration 3; voxel**  
140 **size 2×2×2mm, EPI factor=104, Echo spacing=0.73ms). The approximate total recording time for the**  
141 **MR session was 27 minutes.**
